# Supplementary material for: Enhanced active oxidative species generation over Fe-doped defective TiO2 nanosheets for boosted photodegradation
Source: Royal Society of Chemistry journal article supplement (doi:10.1039/d0ra08116g), 2020-01-01
Supplement: d0ra08116g1.pdf [file d0ra08116g1.pdf]

**Enhanced active oxidative species generation over Fe-doping  
defective TiO<sub>2</sub> nanosheets for boosted photodegradation**

Xintong Gao<sup>a</sup>, Shuai Zhang<sup>b</sup>, Jingchao Liu<sup>c</sup>, Shiqi Xu<sup>a</sup> and Zenghe Li<sup>\*a</sup>

## ***Materials***

Tetrabutyl titanate ( $\text{Ti}(\text{OBu})_4$ ), tetracycline hydrochloride (TC-HCl), ethylenediaminetetraacetic acid (EDTA) and bulk anatase  $\text{TiO}_2$  were purchased from Aladdin Co., Ltd. Iron(III) nitrate nonahydrate ( $\text{Fe}(\text{NO}_3)_3 \cdot 9\text{H}_2\text{O}$ ) and tertiary butyl alcohol (TBA) were obtained from Tianjin Fuchen Chemical Reaction Factory. The  $\text{Ti}(\text{OBu})_4$  and  $\text{Fe}(\text{NO}_3)_3 \cdot 9\text{H}_2\text{O}$  were of analytical grade. Anhydrous ethanol, hydrofluoric acid (HF, 40 wt.%), and hydrogen peroxide ( $\text{H}_2\text{O}_2$ , 30wt.%) were purchased from Beijing Chemical Corporation. Rhodamine B (RhB) and p-benzoquinone (PBQ) were obtained from Sinopharm Chemical Reagent Co., Ltd. Ultra-pure water was used in all experiments.

***Synthesis of X%- $\text{TiO}_2$  nanosheets*** (where X% is the mole percent of Fe, expressed as  $100\% \times \text{mol Fe} / \text{mol Ti}$ )

In a typical synthesis, 0.1685 g, 0.2808 g, 0.3931 g, 0.5054 g of  $\text{Fe}(\text{NO}_3)_3 \cdot 9\text{H}_2\text{O}$  were added into anhydrous ethanol (40 mL) containing  $\text{Ti}(\text{OBu})_4$  (10 mL) and HF (1.2 mL), respectively. After stirring for 30 min, the solution was transferred into a stainless steel autoclave (100 mL) and then heated at 180 °C for 2 h. The products were collected by centrifugation and washed repeatedly with ultra-pure water. Finally, the products were dried at 60 °C under vacuum for 24 h.

## ***Photocatalysts characterization***

XRD patterns for photocatalysts were recorded by X-ray diffractometer (XRD, Bruker D8 Advance). The morphology of photocatalysts was characterized using a high-resolution transmission electron microscopy (HRTEM, JEOL-2100). Elemental analyses were obtained on inductively coupled plasma atomic emission spectroscopy (ICP-AES-7500, SHIMADZU). Chemical composition analyses were performed using a scanning transmission electron microscope (STEM, FEI Tecnai G2 F30) equipped with energy dispersive X-ray (EDX). Raman spectra were collected on Renishaw in Via spectrometer system. X-ray photoelectron spectroscopy (XPS) was performed on a KRATOS AXIS SUPRA system equipped with an Al  $K\alpha$  X-ray source. Brunauer-Emmett-Teller (BET) surface areas and  $\text{N}_2$  physisorption isotherms were measured with a surface area and porosity analyzer (ASAP 2460t, Micromeritics), using liquid

nitrogen adsorbent at 77 K. Ultraviolet-Visible diffuse reflectance spectra (UV-DRS) were measured on a spectrophotometer (UV-3600, Shimadzu) using BaSO<sub>4</sub> as the reflectance standard. Photoluminescence spectra (PL) were obtained at room temperature using a fluorescence spectrophotometer (FLS700, Hitachi) (EM Start WL: 260.0 nm). Electron paramagnetic resonance (EPR) spectra were obtained on a Bruker EPR-E500 spectrometer. The thickness of the 3.5%-TiO<sub>2</sub> nanosheets was determined by atomic force microscopy (AFM) (Bruker FastScan).

### ***Photocatalytic activity evaluation***

The photocatalytic performance of all the as-prepared samples was investigated by measuring the degradation rate of RhB aqueous solution (10 mg L<sup>-1</sup>) and TC-HCl aqueous solution (20 mg L<sup>-1</sup>) under simulated sunlight irradiation (300 W xenon lamp, CEL-HXF300, Beijing Zhongjiao Jinyuan Technology Co., Ltd.). In each photocatalytic reaction, 80 mg photocatalysts and 1.5 mmol H<sub>2</sub>O<sub>2</sub> were added into an aqueous RhB solution of 80 mL, and then the suspensions were stirred in the dark for 40 min to reach the adsorption-desorption equilibrium between photocatalysts and RhB solutions. Under light irradiation, 4 mL of RhB solution was sampled at 5 min interval and filtered to remove the photocatalysts for optical absorbance measurements. To analogous, 10 mg sample and 1.5 mmol H<sub>2</sub>O<sub>2</sub> were added into an aqueous TC-HCl solution of 80 mL, and then the suspension was stirred in the dark for 40 min to reach the adsorption-desorption equilibrium between photocatalysts and TC-HCl solutions. During irradiation, 4 mL of TC-HCl solution was sampled at 10 min interval and filtered to remove the photocatalysts for optical absorbance measurements. The absorbance of reaction solution was measured with a UV-vis spectrophotometer (UVmini-1240, Shimadzu), and the concentration of pollutants was determined by the RhB and TC-HCl standard curve. According to Beer's law, the absorbance at 553 nm (the characteristic absorption wavelength of RhB) and 357 nm (the characteristic absorption wavelength of TC-HCl) were proportional to the concentration of RhB and TC-HCl in the reaction solution, respectively. Furthermore, the kinetic behaviors of photocatalysts were investigated through a pseudo-first-order model,  $\ln[C/C_0] = -kt + \alpha$ . Here,  $C_0$  and  $C$  present the initial concentration before irradiation and the residual

concentration of RhB and TC-HCl solution after irradiation for  $t$  min, respectively, and  $k$  is the apparent rate constant.

In the cycle test experiments, photocatalytic performance of 3.5%-TiO<sub>2</sub> was evaluated by performing 20 min of RhB photodegradation and 60 min of TC-HCl photodegradation experiments. Then the photocatalysts were recovered from the reaction solution, repeatedly washed with ethanol/ultrapure water and dried, and reused in photodegradation tests (ethanol was completely removed from the photocatalysts before the photocatalytic testing). A total of 4 such reaction cycles were performed (with approximately the same amount of photocatalyst used in each reaction cycle).

#### ***Active oxidative species (AOS) trapping***

Generally, holes ( $h^+$ ), superoxide radical ( $\bullet O_2^-$ ), and hydroxyl radicals ( $\bullet OH$ ) are considered as predominant AOS for dyes and antibiotics photodegradation.<sup>1-2</sup> To investigate the predominant AOS involved, radicals trapping experiments were performed, which is similar to former photocatalytic activity measurement. In this process, TBA (10 mmol L<sup>-1</sup>), PBQ (10 mmol L<sup>-1</sup>), and EDTA (10 mmol L<sup>-1</sup>) were used as the scavengers for  $\bullet OH$ ,  $\bullet O_2^-$ , and  $h^+$ , respectively.

#### ***EPR tests***

EPR tests were performed by using a Bruker EPR-E500 spectrometer operating at room temperature. The  $\bullet O_2^-$  radicals can be captured by 5,5-dimethyl-1-pyrroline N-oxide (DMPO). For the detection of DMPO- $\bullet O_2^-$  adducts, 20 mg of 3.5%-TiO<sub>2</sub> photocatalyst and a small amount of H<sub>2</sub>O<sub>2</sub> were added into 50  $\mu$ L of 5 wt.% DMPO/DMSO solution.

#### ***Electrochemical measurements***

The electrochemical measurements were performed on a CHI 660E electrochemical workstation equipped with a three-electrode cell. The working electrode was a glassy carbon electrode coated with catalysts, the counter electrode was a platinum foil, and the reference electrode was a saturated Ag/AgCl electrode with saturated K<sub>2</sub>SO<sub>4</sub> (1 mol L<sup>-1</sup>) as the electrolyte. The electrochemical impedance spectroscopy (EIS) measurements were conducted over a frequency range 0.01-10<sup>5</sup> Hz without light. Photocurrent measurements and Mott-Schottky experiments were conducted with voltage range from -1.5 V-0 V, in accordance with procedures previous work.<sup>3</sup>

Poisson's equation can be solved to give the Mott-Schottky equation:<sup>4</sup>

$$\frac{1}{C^2} = \frac{2}{\epsilon\epsilon_0 e A^2 N_D} \left( V - V_{fb} - \frac{k_B T}{e} \right)$$

Where  $C$  and  $A$  are the interfacial capacitance and area, respectively,  $N_D$  the number of donors,  $V$  the applied voltage,  $k_B$  is Boltzmann's constant,  $T$  is the temperature, and  $e$  is the electronic charge. Therefore, a plot of  $C^{-2}$  against voltage should yield a straight line from which  $V_{fb}$  can be determined from the intercept on the voltage axis.

The value of  $N_D$  is determined from the slope with knowledge of  $\epsilon$  and  $A$ .<sup>5-6</sup>

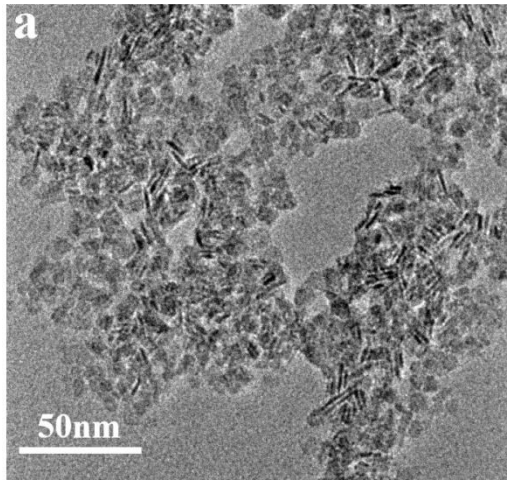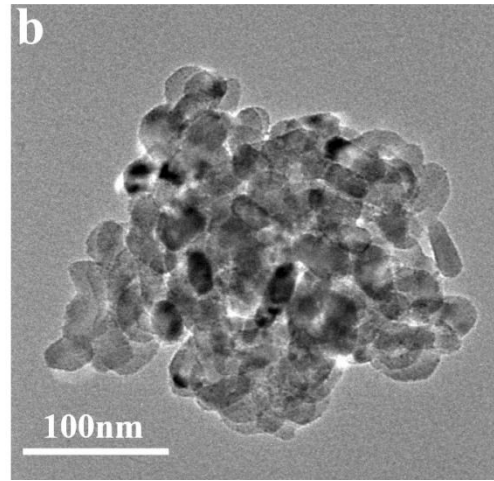

**Fig. S1** TEM images of (a) 0%-TiO<sub>2</sub> nanosheets and (b) Bulk-TiO<sub>2</sub>.

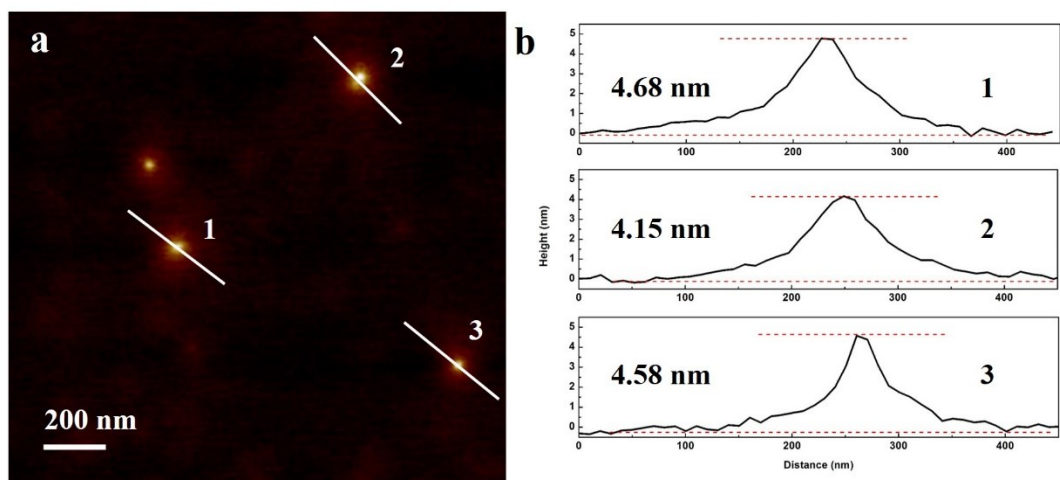

Fig. S2 (a) AFM image and (b) corresponding height profiles of 3.5%-TiO<sub>2</sub> nanosheets (the numbers 1, 2 and 3 correspond to the line scan number in (a)).

**Table S1** ICP-AES data for the actual contents of Fe doping in X%-TiO<sub>2</sub> nanosheets (X = 1.5, 2.5, 3.5, 4.5).

| sample                | cFe (ppm) | cTi (ppm) | X (%)<br>(X = Fe/Ti molar ratio) |
|-----------------------|-----------|-----------|----------------------------------|
| 1.5%-TiO <sub>2</sub> | 4.716     | 233.2     | 1.70%                            |
| 2.5%-TiO <sub>2</sub> | 7.833     | 239.1     | 2.75%                            |
| 3.5%-TiO <sub>2</sub> | 10.93     | 236.4     | 3.89%                            |
| 4.5%-TiO <sub>2</sub> | 12.37     | 216.3     | 4.80%                            |

cFe and cTi represent the concentration of metal ions in the catalysts solution.



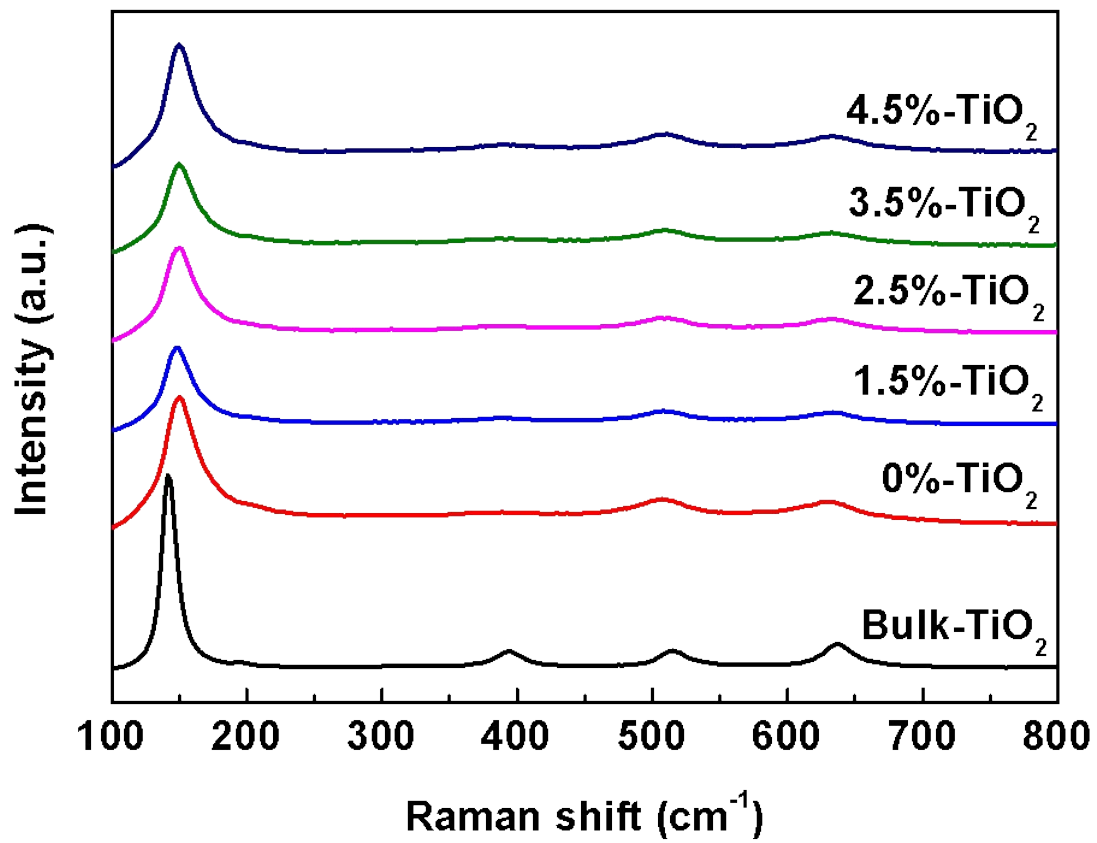

**Fig. S3** (a) Raman spectra for X%-TiO<sub>2</sub> nanosheets (X=0, 1.5, 2.5, 3.5, 4.5) and Bulk-TiO<sub>2</sub>.

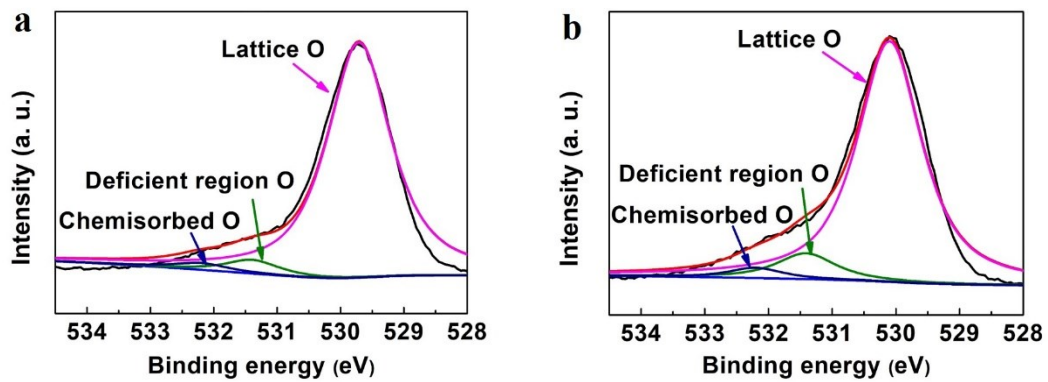

**Fig. S4** XPS spectra of O 1s in the (a) Bulk-TiO<sub>2</sub> and (b) 0%-TiO<sub>2</sub> nanosheets.

**Table S2** Comparison of RhB photodegradation of various photocatalysts reported.

| Catalyst                                    | Light source       | The amount<br>of catalyst<br>(mg) | RhB<br>concentration<br>(ppm) | Photocatalytic<br>degradation rate<br>(min <sup>-1</sup> ) | Reference |
|---------------------------------------------|--------------------|-----------------------------------|-------------------------------|------------------------------------------------------------|-----------|
| 3.5%-TiO <sub>2</sub>                       | 300 W xenon lamp   | 80                                | 10                            | 0.3073                                                     | This work |
| Ce-doped<br>TiO <sub>2</sub>                | 300 W xenon lamp   | 400                               | 10                            | 0.00348                                                    | [7]       |
| B-doped<br>BiOCl                            | 350W xenon lamp    | 10                                | 10                            | 0.01704                                                    | [8]       |
| N-doped<br>ZnWO <sub>4</sub>                | sunlight           | 10                                | 10                            | 0.1708                                                     | [9]       |
| B-doped<br>Bi <sub>2</sub> MoO <sub>6</sub> | 250 W halogen Lamp | 20                                | 5                             | 0.016                                                      | [10]      |
| Pt-doped<br>TiO <sub>2</sub>                | 220W mercury lamp  | 3                                 | 10                            | 0.0053                                                     | [11]      |
| I/C-doped<br>TiO <sub>2</sub>               | 300 W Xe arc lamp  | 50                                | 20                            | 0.1600                                                     | [12]      |
| C-N-S-doped<br>TiO <sub>2</sub>             | 8 W UV lamp        | 20                                | 10                            | 0.01234                                                    | [13]      |
| Fe-N-S-tri-<br>doped TiO <sub>2</sub>       | 500 W Xenon lamp   | 200                               | 20                            | 0.0291                                                     | [14]      |
| C/N-doped<br>Au/TiO <sub>2</sub>            | 500 W xenon lamp   | 5                                 | 4.79                          | 0.0071                                                     | [15]      |

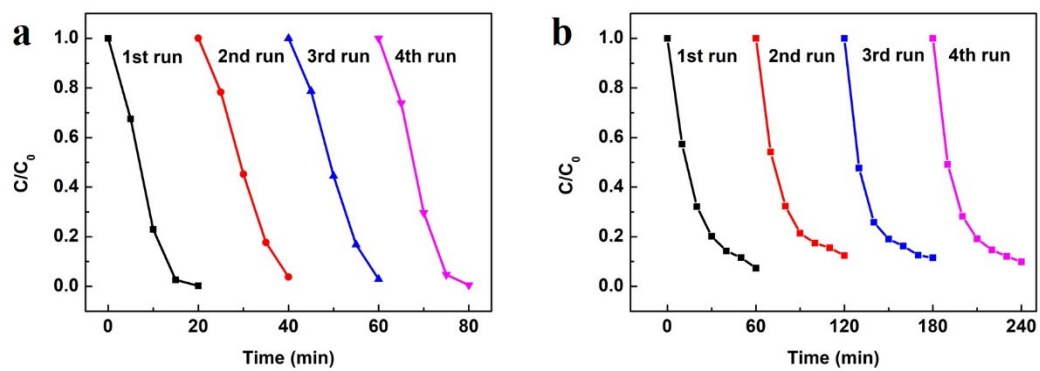

**Fig. S5** Cycling runs of 3.5%-TiO<sub>2</sub> nanosheets for photocatalytic degradation of (a) RhB and (b) TC-HCl solution.

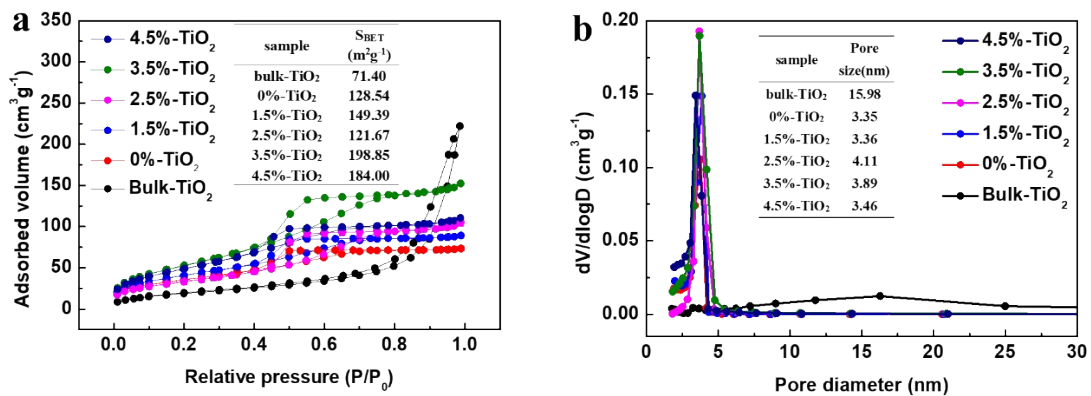

**Fig. S6** (a) N<sub>2</sub> adsorption-desorption isotherms of X%-TiO<sub>2</sub> nanosheets and Bulk-TiO<sub>2</sub>. (b) Pore size distribution of X%-TiO<sub>2</sub> nanosheets and Bulk-TiO<sub>2</sub>.

According to the International Union of Pure and Applied Chemistry (IUPAC) classification,<sup>16</sup> the isotherm curves of Bulk-TiO<sub>2</sub> can be classified as Type-II isotherms, which manifested the nature of micropores.<sup>17</sup> The X%-TiO<sub>2</sub> nanosheets showed Type-IV isotherms with H2-type hysteresis in the relative pressure of 0.4-0.8, which confirmed the presence of mesopores in the ultrathin X%-TiO<sub>2</sub> nanosheets.

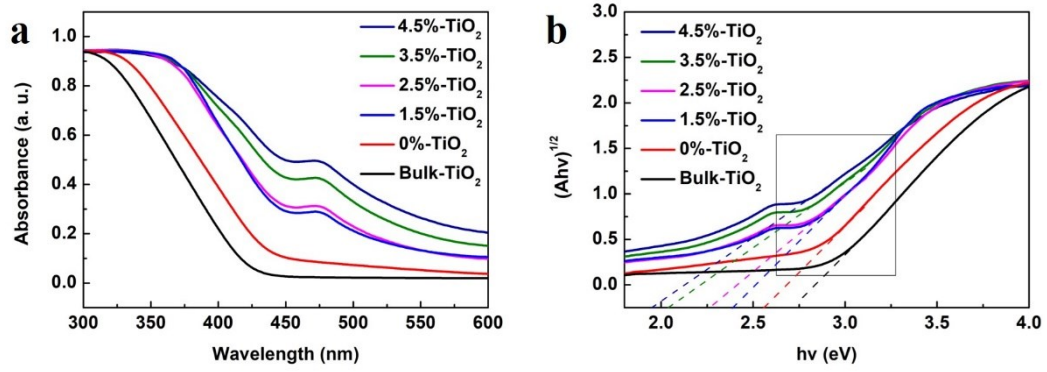

**Fig. S7** (a) UV-DRS data and (b) Tauc plots for  $X\%$ - $\text{TiO}_2$  nanosheets and Bulk- $\text{TiO}_2$ .

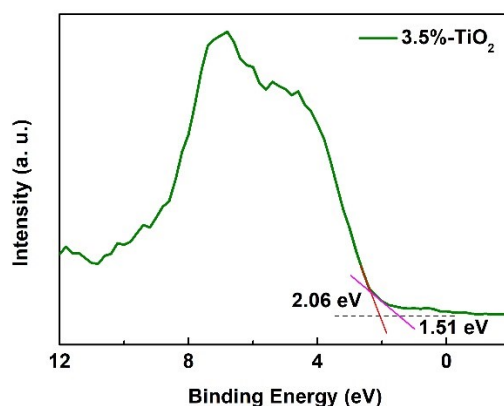

**Fig. S8** XPS valence band spectra of 3.5%-TiO<sub>2</sub>.

According to the UV-DRS (Fig. S7a-b) and Mott-Schottky diagram (Fig. 5d), the band gap and conduction band (CB) position of 3.5%-TiO<sub>2</sub> nanosheets were estimated to be 2.04 eV and -0.54 eV, respectively. The valence band (VB) position of 3.5%-TiO<sub>2</sub> nanosheets was thus calculated to be about 1.50 eV. The VB maximum of 3.5%-TiO<sub>2</sub> was also measured by XPS valance spectra, a VB edge was 2.06 eV and a band tailing was 1.51 eV (Fig. S8).<sup>18-20</sup> In addition, the band edge energy ( $E_{CB}$ ,  $E_{VB}$ ) of 3.5%-TiO<sub>2</sub> nanosheets was further calculated according to the empirical equation as follow:<sup>21</sup>

$$E_{VB} = \chi - E^C + \frac{1}{2}Eg$$

where  $\chi$  represents the electronegativity of the semiconductors (here, the value of  $\chi$  is 5.18 eV for 3.5%-TiO<sub>2</sub>),<sup>22</sup>  $E^C$  is the standard hydrogen electrode scale (NHE) ( $E^C = 4.5$  eV)<sup>21</sup> and  $Eg$  is the bandgap for 3.5%-TiO<sub>2</sub> ( $Eg = 2.04$  eV). The calculated  $E_{VB}$  for 3.5%-TiO<sub>2</sub> is found to be about 1.70 eV. Considering the above calculation results, experimental data and inevitable experimental errors, the VB position of 3.5%-TiO<sub>2</sub> is inferred between 1.50-2.06 eV. According to the previous reports, some typical semiconductor photocatalysts with VB position between 1.50-2.06 eV can also generate holes with sufficient oxidation potential for the photodegradation of RhB and TC-HCl in water,<sup>23-24</sup> Moreover, both superoxide radical ( $\bullet\text{O}_2^-$ ) and photo-generated holes contributed to the photodegradation of RhB and TC-HCl, as proved by radicals trapping experiments and EPR tests (Fig. 6a-c). Considering that both  $\bullet\text{O}_2^-$  and the photo-

generated holes of 3.5%-TiO<sub>2</sub> possess sufficient oxidation ability to oxidize RhB and TC-HCl, so it would be safe to deduce that the 3.5%-TiO<sub>2</sub> nanosheets has sufficient oxidation for oxidizing the pollutants.



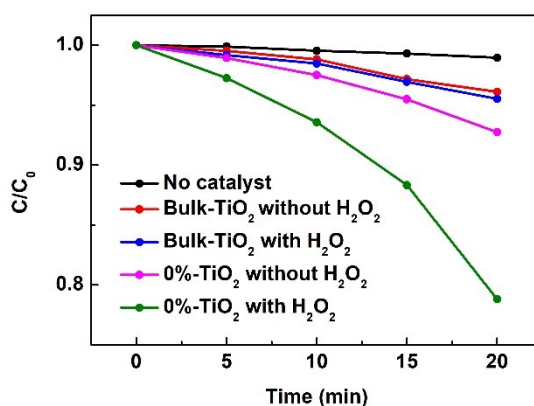

**Fig. S9** Time profiles of RhB degradation for 0%-TiO<sub>2</sub> nanosheets and Bulk-TiO<sub>2</sub> with or without H<sub>2</sub>O<sub>2</sub>.

To explore the role of H<sub>2</sub>O<sub>2</sub> in the photocatalytic reaction, we carried out a series of control experiments. As shown in Fig. S9, when there is no catalyst and only H<sub>2</sub>O<sub>2</sub> in the reaction system, the concentration of RhB remained basically unchanged after 20 min light irradiation, which means that H<sub>2</sub>O<sub>2</sub> itself cannot achieve the RhB photodegradation without the aid of photocatalysts. For Bulk-TiO<sub>2</sub>, regardless of whether H<sub>2</sub>O<sub>2</sub> is added to the reaction solution, the removal efficiency of RhB was almost unchanged after 20 min light irradiation, while the 0%-TiO<sub>2</sub> nanosheets displayed improved degradation performance in the presence of H<sub>2</sub>O<sub>2</sub>, with the RhB removal efficiency of 19.2%, which is higher than that for 0%-TiO<sub>2</sub> in the absence of H<sub>2</sub>O<sub>2</sub>. Since ultrathin 0%-TiO<sub>2</sub> nanosheets possessed higher concentration of Vo than Bulk-TiO<sub>2</sub>, it is assumed that H<sub>2</sub>O<sub>2</sub> can play a role in boosting the photocatalytic degradation only in the presence of photocatalysts rich in Vo. This inference may also be valid for 3.5%-TiO<sub>2</sub> nanosheets.

In the photocatalysis process, H<sub>2</sub>O<sub>2</sub> can be reduced to •OH by photo-generated electrons,<sup>25-26</sup> while it can also be oxidized to •O<sub>2</sub><sup>-</sup> by photo-generated holes.<sup>25, 27-28</sup> Through radical capture experiments, the main oxidative species for RhB/TC-HCl degradation by 3.5%-TiO<sub>2</sub> were identified to be holes and •O<sub>2</sub><sup>-</sup>, rather than •OH (Fig. 6a-b). Thence, it is possible that Vo-rich TiO<sub>2</sub> nanosheets converted H<sub>2</sub>O<sub>2</sub> into more •O<sub>2</sub><sup>-</sup> which contribute to the pollutants degradation. The above experimental results

manifested that  $\text{H}_2\text{O}_2$  could not only participate in the Fenton reaction, but also be oxidized to  $\bullet\text{O}_2^-$  by photo-generated holes in the assistance of Vo-rich  $\text{TiO}_2$  photocatalysts, thereby further promoting the degradation of RhB or TC-HCl.

## References

- 1 X. Zhang, L. Li, Y. Zeng, F. Liu, J. Yuan, X. Li, Y. Yu, X. Zhu, Z. Xiong, H. Yu and Y. Xie, *ACS Appl. Nano Mater.*, 2019, **2**, 7255-7265.
- 2 Y. Wang, L. Rao, P. Wang, Z. Shi and L. Zhang, *Appl. Catal. B: Environ.*, 2020, **262**, 118308.
- 3 Y. Zhao, Y. Zhao, G. I. N. Waterhouse, L. Zheng, X. Cao, F. Teng, L.-Z. Wu, C.-H. Tung, D. O'Hare and T. Zhang, *Adv. Mater.*, 2017, **29**, 1703828.
- 4 Y. Zhao, Y. Zhao, R. Shi, B. Wang, G. I. N. Waterhouse, L.-Z. Wu, C.-H. Tung and T. Zhang, *Adv. Mater.*, 2019, **31**, 1806482.
- 5 K. Gelderman, L. Lee and S. W. Donne, *J. Chem. Educ.*, 2007, **84**, 685.
- 6 J. Chen, B. Li, J. Zheng, S. Jia, J. Zhao, H. Jing and Z. Zhu, *J. Phys. Chem. C.*, 2011, **115**, 7104-7113.
- 7 Z. Liu, L. Xing, H. Ma, L. Cheng, J. Liu, J. Yang and Q. Zhang, *Environ. Prog. Sustain. Energy.*, 2017, **36**, 494-504.
- 8 C. Yu, H. He, Q. Fan, W. Xie, Z. Liu and H. Ji, *Sci. Total Environ.*, 2019, **694**, 133727.
- 9 Y. A. Sethi, C. S. Praveen, R. P. Panmand, A. Ambalkar, A. K. Kulkarni, S. W. Gosavi, M. V. Kulkarni and B. B. Kale, *Catal. Sci. Technol.*, 2018, **8**, 2909-2919.
- 10 M. Wang, J. Han, P. Guo, M. Sun, Y. Zhang, Z. Tong, M. You and C. Lv, *J. Phys. Chem. Solids.*, 2018, **113**, 86-93.
- 11 R. Pol, M. Guerrero, E. García-Lecina, A. Altube, E. Rossinyol, S. Garroni, M. D. Baró, J. Pons, J. Sort and E. Pellicer, *Appl. Catal. B-Environ.*, 2016, **181**, 270-278.
- 12 J.-C. Wang, H.-H. Lou, Z.-H. Xu, C.-X. Cui, Z.-J. Li, K. Jiang, Y.-P. Zhang, L.-B. Qu and W. Shi, *J. Hazard. Mater.*, 2018, **360**, 356-363.
- 13 X. Cheng, X. Yu and Z. Xing, *J. Phys. Chem. Solids*, 2013, **74**, 684-690.
- 14 X. Xu, X. Zhou, L. Zhang, L. Xu, L. Ma, J. Luo, M. Li and L. Zeng, *Mater. Res. Bull.*, 2015, **70**, 106-113.
- 15 Y. Li, S. Cao, A. Zhang, C. Zhang, T. Qu, Y. Zhao and A. Chen, *Appl. Surf. Sci.*, 2018, **445**, 350-358.
- 16 D. X. Martínez Vargas, J. Rivera De la Rosa, C. J. Lucio-Ortiz, A. Hernández-Ramirez, G. A. Flores-Escamilla and C. D. Garcia, *Appl. Catal. B-Environ.*, 2015, **179**, 249-261.
- 17 T. Wang, W. Li, D. Xu, X. Wu, L. Cao and J. Meng, *Appl. Surf. Sci.*, 2017, **426**, 325-332.
- 18 X. Chen, L. Liu, P. Y. Yu and S. S. Mao, *Science*, 2011, **331**, 746.
- 19 A. Naldoni, M. Allieta, S. Santangelo, M. Marelli, F. Fabbri, S. Cappelli, C. L. Bianchi, R. Psaro and V. Dal Santo, *J. Am. Chem. Soc.*, 2012, **134**, 7600-7603.
- 20 S. G. Ullattil and R. M. Ramakrishnan, *ACS Appl. Mater. Interfaces*, 2018, **1**, 4045-4052.
- 21 Zhang, L. Li, Y. Zeng, F. Liu, J. Yuan, X. Li, Y. Yu, X. Zhu, Z. Xiong, H. Yu and Y. Xie, *ACS Appl. Nano Mater.*, 2019, **2**, 7255-7265.
- 22 M. A. Majeed Khan, R. Siwach, S. Kumar and A. N. Alhazaa, *Opt. Laser Technol.*, 2019, **118**, 170-178.
- 23 R. Zhao, X. Sun, Y. Jin, J. Han, L. Wang and F. Liu, *J. Mater. Sci.*, 2019, **54**, 5445-

5456.

- 24 Y. Wang, X. Yang, T. Ye, C. Xu, F. Xia and D. Meng, *J. Electron. Mater.*, 2017, **46**, 1598-1606.
- 25 T. Hirakawa and Y. Nosaka, *Langmuir*, 2002, **18**, 3247-3254.
- 26 J. Rabani, K. Yamashita, K. Ushida, J. Stark and A. Kira, *J. Phys. Chem. B*, 1998, **102**, 1689-1695.
- 27 L. Sun and J. R. Bolton, *J. Phys. Chem.*, 1996, **100**, 4127-4134.
- 28 Y. Nosaka and A. Nosaka, *Chem. Rev.*, 2017, **117**, 11302–11336.
